# Supplementary material
Source: PubMed Central journal article supplement (PMC4008333)

## Supplemental Figures

Figure S1. AMD plasma concentration-time profiles from three studies used for population pharmacokinetic model development. Insert shows the first 2 hours after drug administration.

Figure S2. Mechanistic catheter clearance model incorporating blood-draw return cycles to clear catheter contamination. (A) schematic of the model compartments and kinetic processes; (B,C) One representative patient from the CHOP pilot study was simulated 100 times. Medians of simulated amount of AMD in model compartments were plotted as a function of varying blood-draw return cycles at (B) 12 minutes and (C) 37 minutes after dosing.

Figure S1

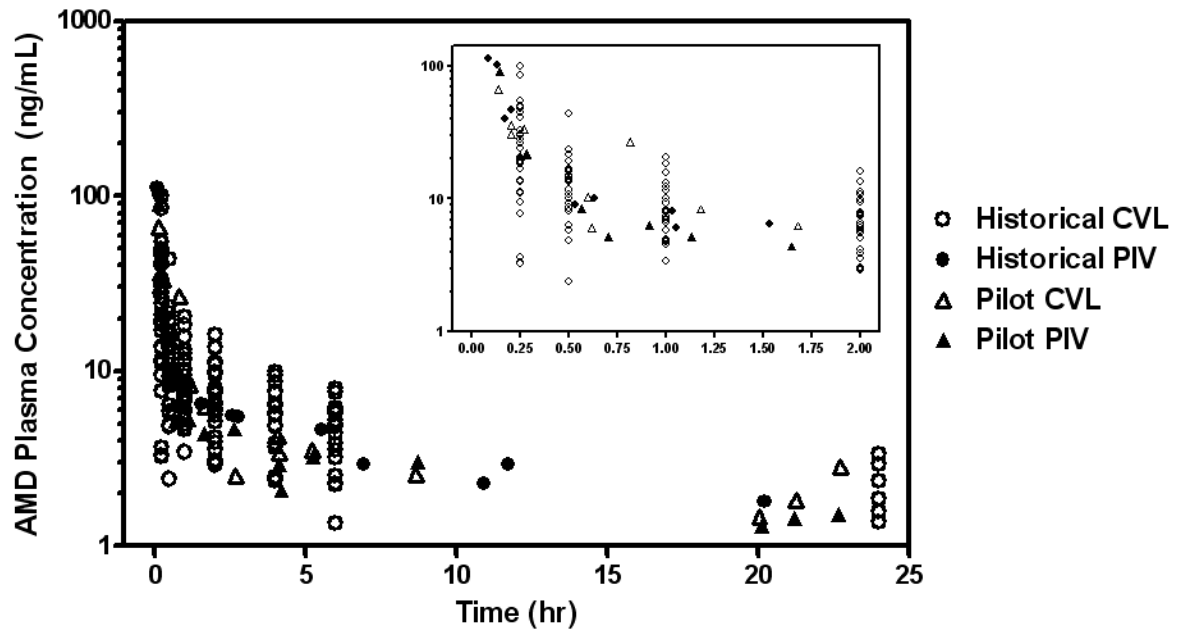

Figure S2 A

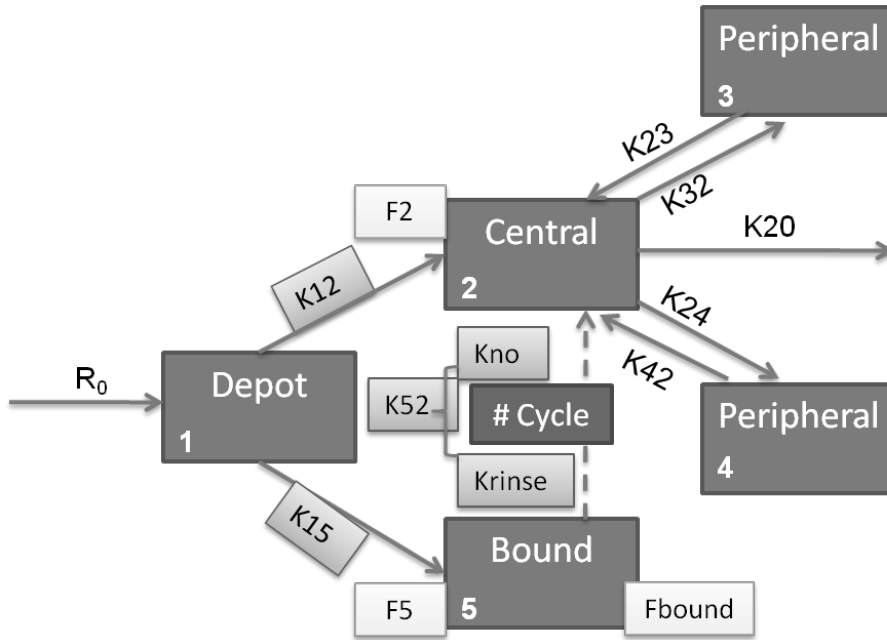

Figure S2 B

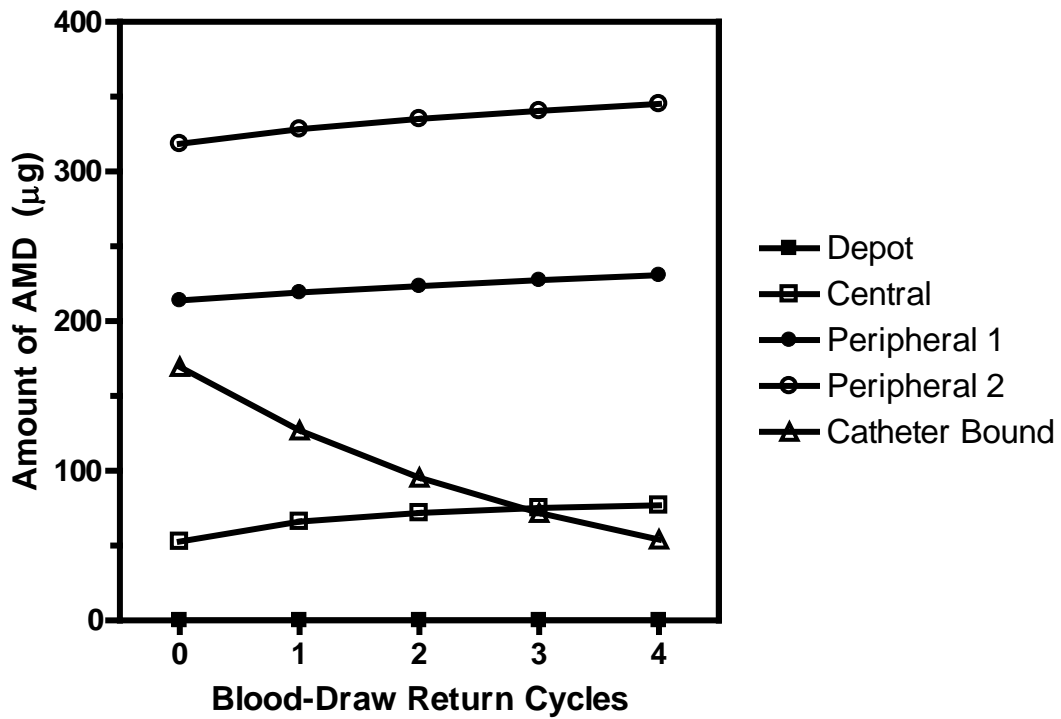

Figure S2 C

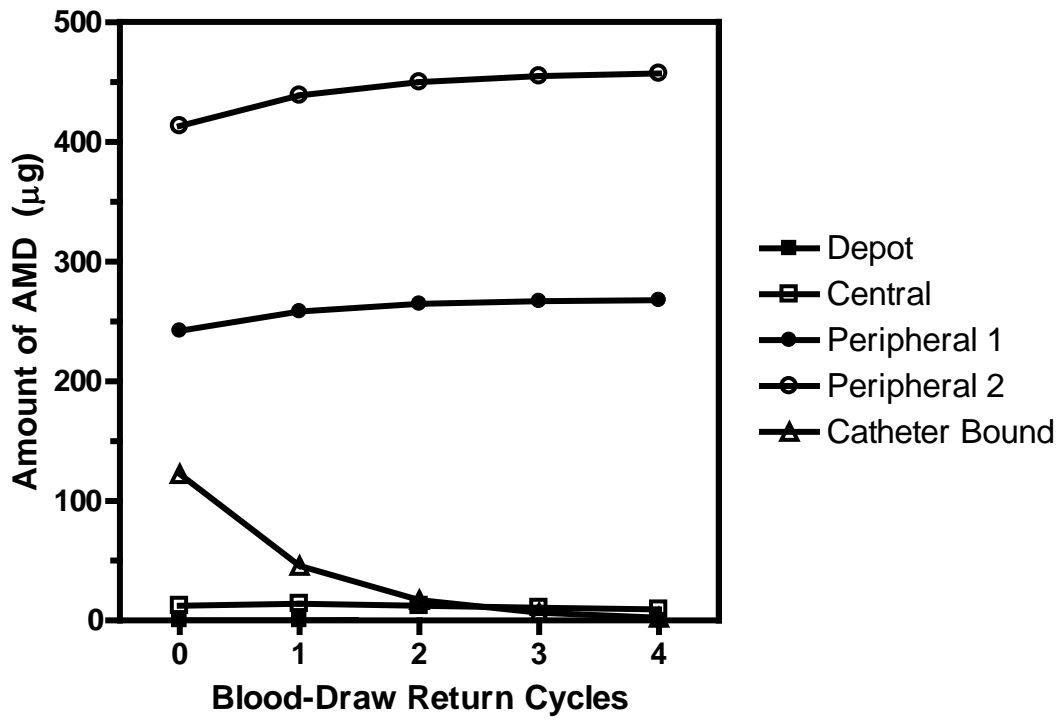

Supplement: NIHMS425000-supplement-Suppl_Figs.pdf [file NIHMS425000-supplement-Suppl_Figs.pdf]
